# Supplementary material for: Impact of Prenatal Alcohol Exposure on the Development and Myocardium of Adult Mice: Morphometric Changes, Transcriptional Modulation of Genes Related to Cardiac Dysfunction, and Antioxidant Cardioprotection
Source: MDPI journal article supplement (doi:10.3390/antiox12020256), 2023-01-23
Supplement: s1 [file s1]

**Table S1.** Selected genes for mRNA quantification (Custom TaqMan® Plates). STP – signal transduction pathway

| STP                                   | Gene            | Name                                                                    | NCBI-RefSeq    |
|---------------------------------------|-----------------|-------------------------------------------------------------------------|----------------|
| <b>Angiogenesis and cell survival</b> | <i>Akt1</i>     | V-akt murine thymoma viral oncogene homolog 1                           | NM_009652.4    |
|                                       | <i>Vegfa</i>    | Vascular endothelial growth factor A                                    | NM_001287056.1 |
| <b>Cell apoptosis</b>                 | <i>Bax</i>      | BCL2-associated X protein                                               | NM_007527.4    |
|                                       | <i>Fas</i>      | Fas (TNF receptor superfamily member 6)                                 | NM_007987.2    |
|                                       | <i>Mapk1</i>    | Mitogen-activated protein kinase 1                                      | NM_011949.3    |
|                                       | <i>Mapk14</i>   | Mitogen-activated protein kinase 14                                     | NM_011951.3    |
|                                       | <i>Trp53</i>    | Transformation related protein 53                                       | NM_011640.3    |
| <b>Calcium Kinetics</b>               | <i>Atp2a2</i>   | ATPase, Ca++ transporting, cardiac muscle, slow twitch 2                | NM_001110140.3 |
|                                       | <i>Casq2</i>    | Calsequestrin 2                                                         | NM_001355663.1 |
|                                       | <i>Pln</i>      | Phospholamban                                                           | NM_001141927.1 |
|                                       | <i>RyR-2</i>    | Ryanodine receptor 2, cardiac                                           | NM_023868.2    |
|                                       | <i>Slc8a1</i>   | Solute carrier family 8 (sodium/calcium exchanger), member 1            | NM_011406.3    |
| <b>Oxidative stress</b>               | <i>Cat</i>      | Catalase                                                                | NM_009804.2    |
|                                       | <i>Gpx4</i>     | Glutathione peroxidase 4                                                | NM_008162.4    |
|                                       | <i>Hspa1a/b</i> | Heat shock protein 1A                                                   | NM_010479.2    |
|                                       |                 | Heat shock protein 1B                                                   | NM_010478.2    |
|                                       | <i>Sod1</i>     | Superoxide dismutase 1, soluble                                         | NM_011434.2    |
| <b>Cardiac hypertrophy</b>            | <i>Ace</i>      | Angiotensin I converting enzyme (peptidyl-dipeptidase A) 1              | NM_207624.6    |
|                                       | <i>Ace2</i>     | Angiotensin I converting enzyme (peptidyl-dipeptidase A) 2              | NM_001130513.1 |
|                                       | <i>Agtr1a</i>   | Angiotensin II receptor, type 1a                                        | NM_177322.3    |
|                                       | <i>Cabin1</i>   | Calcineurin binding protein 1                                           | NM_172549.3    |
|                                       | <i>Chp2</i>     | Calcineurin-like EF hand protein 2                                      | NM_027363.1    |
|                                       | <i>Edn1</i>     | Endothelin 1                                                            | NM_010104.4    |
|                                       | <i>Igf1</i>     | Insulin-like growth factor 1                                            | NM_010512.5    |
|                                       | <i>Map3k2</i>   | Mitogen-activated protein kinase kinase kinase 2                        | NM_011946.3    |
|                                       | <i>Myh6</i>     | Myosin, heavy polypeptide 6, cardiac muscle, alpha                      | NM_001164171.1 |
|                                       | <i>Myh7</i>     | Myosin, heavy polypeptide 7, cardiac muscle, beta                       | NM_080728.3    |
|                                       | <i>Nfatc3</i>   | Nucl. factor of activated T cells, cytoplasmic, calcineurin dependent 3 | NM_010901.3    |
|                                       | <i>Nppa</i>     | Natriuretic peptide type A                                              | NM_008725.3    |
|                                       | <i>Nppb</i>     | Natriuretic peptide type B                                              | NM_008726.6    |
|                                       | <i>Prkca</i>    | Protein kinase C, alpha                                                 | NM_011101.3    |
|                                       | <i>Prkcb</i>    | Protein kinase C, beta                                                  | NM_008855.2    |
|                                       | <i>Prkcg</i>    | Protein kinase C, gamma                                                 | NM_011102.4    |
| <b>Inflammation</b>                   | <i>IL-6</i>     | Interleukin 6                                                           | NM_031168.2    |
|                                       | <i>Tnfrsf1a</i> | Tumor necrosis factor receptor superfamily, member 1a                   | NM_011609.4    |
|                                       | <i>Tnf</i>      | Tumor necrosis factor                                                   | NM_013693.3    |
| <b>Extracellular Matrix</b>           | <i>Col1a1</i>   | Collagen, type I, alpha 1                                               | NM_007742.4    |
|                                       | <i>Col3a1</i>   | Collagen, type III, alpha 1                                             | NM_009930.2    |
|                                       | <i>Mmp9</i>     | Matrix metalloproteinase 9                                              | NM_013599.5    |
|                                       | <i>Tgfb1</i>    | Transforming growth factor, beta 1                                      | NM_011577.2    |
|                                       | <i>Tnc</i>      | Tenascin C                                                              | NM_001369211.1 |
| <b>Cellular metabolism</b>            | <i>Gapdh</i>    | Glyceraldehyde-3-phosphate dehydrogenase                                | NM_001289726.2 |
|                                       | <i>Hk1</i>      | Hexokinase 1                                                            | NM_001146100.1 |
|                                       | <i>Ndufa3</i>   | NADH:ubiquinone oxidoreductase subunit A3                               | NM_025348.3    |
|                                       | <i>Pfkfb</i>    | Phosphofructokinase, muscle                                             | NM_001163487.1 |
|                                       | <i>Slc2a1</i>   | Solute carrier family 2 (facilitated glucose transporter), member 1     | NM_011400.3    |
|                                       | <i>Taz</i>      | Tafazzin, phospholipid-lysophospholipid transacylase                    | NM_001173547.2 |
|                                       | <i>Ucp-2</i>    | Uncoupling protein 2 (mitochondrial, proton carrier)                    | NM_011671.5    |
